# Supplementary material
Source: publisher site journal article supplement (https://phytokeys.pensoft.net/article/49604/download/suppl/31/)
Supplement: Supplementary file 1

## Sheet: All taxa
nrITS GenBank Accession	matK GenBank Accession	trnL-F GenBank Accession	Taxon	Goodeniaceae project #	Herbarium accession	Collector	Collector Number	Shepherd et al. name	Shepherd et al. classification	Phylogenetic clade
MN842315	MN842543	MN831679	Coopernookia polygalacea (de Vriese) Carolin	830	KPBG 19913435	K.A. Shepherd, S.R. Willis	KS 1521
MN842329	JQ711571	JQ682846	Goodenia affinis de Vriese	S19	CBG 8310208	J. Taylor, P. Ollerenshaw	1699	Goodenia affinis	subg. Goodenia sect. Rosulatae	Goodenia ss II_I
MN842330			Goodenia albiflora Schltdl.	S20	CANB 352064	D.E. Symon	13346	Goodenia albiflora	subg. Goodenia sect. Goodenia	Goodenia ss I_II
MN842331		MN831692	Goodenia amplexans F.Muell.	544	MEL 2030974	M.G. Corrick	11180	Goodenia amplexans	subg. Goodenia sect. Goodenia	Goodenia ss I_I
MN842332		MN831693	Goodenia anfracta J.M.Black	545	MEL 1598685	D.E. Symon	14512	Goodenia anfracta	subg. Porphyranthus sect. Ebracteolatae	Ebracteolatae I
submitted to GB	KT724216	KT750319	Goodenia angustifolia Carolin	725	DNA D0204965	P.K. Latz, A. Schubert	26410	Goodenia angustifolia	subg. Porphyranthus sect. Ebracteolatae	Ebracteolatae II
MN842333	MN842549	MN831694	Goodenia arachnoidea Carolin	413	PERTH	R.L. Barrett	RLB 6541	Goodenia arachnoidea	subg. Porphyranthus sect. Ebracteolatae	Ebracteolatae II
MN842316	MN842544	MN831680	Goodenia aff. arachnoidea Carolin	542	PERTH	M.D. Barrett	MDB 2839		subg. Porphyranthus sect. Ebracteolatae	Ebracteolatae II
MN842334	MN842550		Goodenia argillacea Carolin	546	MEL 2260865	I.D. Cowie	9890	Goodenia argillacea	subg. Porphyranthus sect. Ebracteolatae	Ebracteolatae II
MN842335	MN842551	MN831695	Goodenia armitiana F.Muell.	388	PERTH 07563825	G. Byrne	1467	Goodenia armitiana	subg. Porphyranthus sect. Ebracteolatae	Ebracteolatae I
MN842337			Goodenia armstrongiana de Vriese 'white flowers'	728	DNA D0197575	D.L. Lewis, B. Wirf	1488	Goodenia armstrongiana	subg. Porphyranthus sect. Ebracteolatae	Ebracteolatae II
MN842336		MN831696	Goodenia armstrongiana de Vriese 'purple flowers'	727	DNA D0216321	K. Brennan	9726	Goodenia armstrongiana	subg. Porphyranthus sect. Ebracteolatae	Ebracteolatae II
MN842338	MN842552		Goodenia armstrongiana de Vriese 'yellow flowers'	726	DNA D0216165	D.L. Lewis	2267	Goodenia armstrongiana	subg. Porphyranthus sect. Ebracteolatae	Ebracteolatae II
MN842339		MN831697	Goodenia arthrotricha Benth.	852	PERTH 8309124	P. Mioduszewski, D. Nicol	PM 1067	Goodenia arthrotricha	subg. Monochila	Clade C (unplaced)
MN842340		MN831698	Goodenia arthrotricha Benth.	853	PERTH 7524218	B. Vincent	s.n.	Goodenia arthrotricha	subg. Monochila	Clade C (unplaced)
MN842341	MN842553	MN831699	Goodenia asteriscus P.J.Lang	657	PERTH 08287155	R.J.P. Davies, L. Ransom	LR 868	Goodenia asteriscus	subg. Porphyranthus sect. Ebracteolatae	Ebracteolatae I
MN842342	KT724229	KT750270	Goodenia atriplexifolia A.E.Holland & T.P.Boyle	547	MEL 2290033	A.R. Bean	22440	Goodenia atriplexifolia	subg. Goodenia sect. Rosulatae	Goodenia ss II_II
		MN831700	Goodenia azurea F.Muell. subsp. azurea	415	PERTH 05559812	R.W. Purdie	3357	Goodenia azurea subsp. azurea	subg. Monochila sect. Scaevolina	Scaevolina
submitted to GB	KT724222	KT750280	Goodenia azurea F.Muell. subsp. azurea	S147	CANB 377111	P.A. Fryxell, L.A. Craven, J. McD. Stewart	4485	Goodenia azurea subsp. azurea	subg. Monochila sect. Scaevolina	Scaevolina
MN842343		MN831701	Goodenia azurea subsp. hesperia L.W.Sage & Albr.	311	PERTH 07292791	C. Day	GH 1	Goodenia azurea subsp. herperia	subg. Monochila sect. Scaevolina	Scaevolina
		MN831702	Goodenia azurea subsp. hesperia L.W.Sage & Albr.	389	PERTH 05663571	T.B. Bragg	2001-25	Goodenia azurea subsp. herperia	subg. Monochila sect. Scaevolina	Scaevolina
	JQ711594	JQ682833	Goodenia bellidifolia Sm. subsp. bellidifolia	278	US 86-0235	Robinson et al.	86-0235	Goodenia bellidifolia subsp. bellidifolia	subg. Monochila sect. Tetraphylax	Tetrathylax
MN842344	KT724278	KT750286	Goodenia benthamiana Carolin	549	MEL 2015267	J. Connock	395	Goodenia benthamiana	subg. Goodenia sect. Goodenia	Goodenia ss I_I
	JQ711619	JQ682651	Goodenia berardiana (Gaudich.) Carolin	181	PERTH 4048075	M.H.G. Gustafsson, K. Bremer	35	Goodenia berardiana	subg. Porphyranthus sect. Ebracteolatae	Ebracteolatae I
	MN842554	MN831703	Goodenia berardiana (Gaudich.) Carolin	348	PERTH 08293910	R. Davis	RD 11774	Goodenia berardiana	subg. Porphyranthus sect. Ebracteolatae	Ebracteolatae I
MN842345	MN842555	MN831704	Goodenia berringbinensis Carolin	753	PERTH 8492611	N. Gibson	6432_B	Goodenia berringbinensis	subg. Porphyranthus sect. Porphyranthus	Porphyranthus I
MN842347	MN842556	MN831705	Goodenia bicolor F.Muell. ex Benth.	855	DNA D0207875	B. Stuckey	863	Goodenia bicolor	subg. Porphyranthus sect. Porphyranthus	Porphyranthus I
MN842346			Goodenia bicolor F.Muell. ex Benth.	750	PERTH 03188620	B.J. Carter	672	Goodenia bicolor	subg. Porphyranthus sect. Porphyranthus	Porphyranthus I
MN842348	MN842557	MN831706	Goodenia blackiana Carolin	S146	AD 98712190	N.N. Donner	10851	Goodenia blackiana	subg. Goodenia sect. Rosulatae	Goodenia ss II_I
MN842349	MN842558	MN831707	Goodenia brachypoda (Benth.) Carolin	313	PERTH 08186359	C. Newland	G 94	Goodenia brachypoda	subg. Porphyranthus sect. Ebracteolatae	Ebracteolatae II
	MN842559	MN831708	Goodenia brunnea Carolin	883	CANB 300672	P.K. Latz	5050	Goodenia brunnea	subg. Goodenia sect. Goodenia	Goodenia ss I_II
MN842350	MN842560	MN831709	Goodenia byrnesii Carolin	550	MEL 2260896	I.D. Cowie	9920	Goodenia byrnesii	subg. Porphyranthus sect. Ebracteolatae	Ebracteolatae II
MN842317			Goodenia aff. byrnesii Carolin	315	PERTH 6840353	A.B. Craig	1494		subg. Porphyranthus sect. Ebracteolatae	Ebracteolatae II
	JQ711681	JQ682859	Goodenia calcarata (F.Muell.) F.Muell.	S76	CBG 8910717	H.R. Toelken	7215	Goodenia calcarata	subg. Goodenia sect. Goodenia	Goodenia ss I_II
submitted to GB	JQ711608	JQ682815	Goodenia campestris Carolin	S75	CBG 9302047	R.M. Barker	222	Goodenia campestris	subg. Porphyranthus sect. Ebracteolatae	Ebracteolatae II
MN842351	MN842561	MN831710	Goodenia centralis Carolin	418	PERTH 05692245	D.J. Edinger, B. Backhouse, G. Marsh	DJE 1884	Goodenia centralis	subg. Goodenia sect. Rosulatae	Goodenia ss II_II
MN842352	MN842562	MN831711	Goodenia centralis Carolin	754	MEL 1575809	M.G. Corrick	10383	Goodenia centralis	subg. Goodenia sect. Rosulatae	Goodenia ss II_II
	JQ711574	JQ682726	Goodenia chambersii F.Muell.	S59	CANB 328499	D.E. Symon	11463	Goodenia chambersii	subg. Goodenia sect. Goodenia	Goodenia ss I_II
MN842353		MN831712	Goodenia chthonocephala Carolin	659	BRI AQ729303	E.J. Thompson	WES1345	Goodenia chthonocephala	subg. Porphyranthus sect. Porphyranthus	Porphyranthus I
AY102790			Goodenia cirrifica F.Muell.		US 2951671	Story	8186	Goodenia cirrifica	subg. Porphyranthus sect. Ebracteolatae	Ebracteolatae II
submitted to GB	JQ711630	JQ682701	Goodenia cirrifica F.Muell.	S73	CANB 058622	P. Ollerenshaw	1623	Goodenia cirrifica	subg. Porphyranthus sect. Ebracteolatae	Ebracteolatae II
MN842354	MN842563	MN831713	Goodenia claytoniacea Benth.	316	PERTH 06691609	F. Hort	2135	Goodenia claytoniacea	subg. Porphyranthus sect. Porphyranthus	Porphyranthus I
MN842355			Goodenia coerulea R.Br.	317	PERTH 07841272	P. Foreman, J. Kelly	PJ 521	Goodenia coerulea	subg. Monochila sect. Coeruleae	Coerulea
MN842356			Goodenia convexa Carolin	420	PERTH 07726023	M. Hislop, M. Griffiths	WW 203 - 42	Goodenia convexa	subg. Goodenia sect. Rosulatae	Goodenia ss II_I
submitted to GB	JQ711627	JQ682854	Goodenia coronopifolia R.Br.	129	CANB 00539168	J. Egan	4378	Goodenia coronopifolia	subg. Porphyranthus sect. Ebracteolatae	Ebracteolatae II
MN842318	MN842545	MN831681	Goodenia aff. coronopifolia R.Br.	758	PERTH D0187887	D.L. Lewis	761		subg. Porphyranthus sect. Ebracteolatae	Ebracteolatae II
MN842357	MN842564	MN831714	Goodenia corynocarpa F.Muell.	318	PERTH 07803532	G. Byrne	2408	Goodenia corynocarpa	subg. Porphyranthus sect. Ebracteolatae	Ebracteolatae I
MN842358		MN831715	Goodenia crenata Carolin & L.W.Sage	422	PERTH 08023190	C. Hughes	80809001	Goodenia crenata	subg. Porphyranthus sect. Ebracteolatae	Ebracteolatae II
MN842359		MN831716	Goodenia cusackiana (F.Muell.) Carolin	423	PERTH 07090390	R.J. Chinnock	9612	Goodenia cusackiana	subg. Porphyranthus sect. Ebracteolatae	Ebracteolatae I
	JQ711579	JQ682697	Goodenia cusackiana (F.Muell.) Carolin	S78	CANB 00538762	S. van Leeuwen	4179	Goodenia cusackiana	subg. Porphyranthus sect. Ebracteolatae	Ebracteolatae I
MN842360	MN842565	MN831717	Goodenia cycloptera R.Br.	424	PERTH 07980396	D.J. Edinger	2280	Goodenia cycloptera	subg. Porphyranthus sect. Ebracteolatae	Ebracteolatae II
	MN842566	MN831719	Goodenia cylindrocarpa Albr.	673	DNA D0148297	J.A. Risler, C.P. Mangion	830	Goodenia cylindrocarpa	subg. Porphyranthus sect. Porphyranthus	Porphyranthus I
MN842361		MN831718	Goodenia cylindrocarpa Albr.	660	DNA D0197876	P.K. Latz, A. Quarmby	25303	Goodenia cylindrocarpa	subg. Porphyranthus sect. Porphyranthus	Porphyranthus I
MN842362	MN842567	MN831720	Goodenia debilis A.E.Holland & T.P.Boyle	661	DNA D0201263	I.D. Cowie, B. Stuckey	12811	Goodenia debilis	subg. Porphyranthus sect. Ebracteolatae	Ebracteolatae II
MN842363			Goodenia decurrens R.Br.	806	US 3062587	Robinson et al.	86-0234	Goodenia decurrens	subg. Monochila sect. Tetraphylax	Tetrathylax
submitted to GB	JQ711689	JQ682788	Goodenia decurrens R.Br.	S65	CBG 8704498	F.E. Davies	346	Goodenia decurrens	subg. Monochila sect. Tetraphylax	Tetrathylax
MN842364			Goodenia decursiva W.Fitzg.	425	PERTH 07222505	J.A. Cochrane, R. Butler, W. Williams	JAC 4919	Goodenia decursiva	subg. Monochila sect. Monochila subsect. Monochila	Monochila
	JQ711590	JQ682676	Goodenia decursiva W.Fitzg.	S48	CBG 8311014	J.M. Taylor	2322	Goodenia decursiva	subg. Monochila sect. Monochila subsect. Monochila	Monochila
MN842365	MN842568		Goodenia delicata Carolin	692	MEL 290596	P.I. Forster	PIF 23723 A	Goodenia delicata	subg. Goodenia sect. Rosulatae	Goodenia ss II_II
MN842366		MN831721	Goodenia dimorpha var. angustifolia Maiden & Betche	872	PERTH 09200479	K.A. Shepherd & J.A. Wege	KS 1540	Goodenia dimorpha var. angustifolia	subg. Monochila sect. Tetraphylax	Tetrathylax
MN842367	JQ711569	JQ682792	Goodenia disperma F.Muell.	S67	CANB 00465688	B.J. Lepschi	1164	Goodenia disperma	subg. Goodenia sect. Rosulatae	Goodenia ss II_II
submitted to GB	JQ711628	JQ682756	Goodenia drummondii Carolin subsp. drummondii	S72	CBG 7909063	J. Taylor	993	Goodenia drummondii subsp. drummondii	subg. Monochila sect. Monochila subsect. Infracta	Monochila
MN842368	MN842569	MN831722	Goodenia durackiana Carolin	662	DNA D0132821	C.R. Michell, D.S. Callis	702	Goodenia durackiana	subg. Porphyranthus sect. Ebracteolatae	Ebracteolatae II
MN842369	MN842570	MN831723	Goodenia dyeri K.Krause	319	PERTH 06311687	B. Archer	1385	Goodenia dyeri	subg. Goodenia sect. Rosulatae	Goodenia ss II_I
MN842370			Goodenia eatoniana F.Muell.	428	PERTH 07804539	G. Byrne	1800	Goodenia eatoniana	subg. Monochila sect. Coeruleae	Coerulea
MN842371		MN831724	Goodenia elaiosoma Cowie	551	MEL 309454	I.D. Cowie, R.A. Kerrigan	8885	Goodenia elaiosoma	subg. Porphyranthus sect. Ebracteolatae	Ebracteolatae II
MN842372	MN842571	MN831725	Goodenia elderi F.Muell. & Tate	320	PERTH 07387466	L.S.J. Sweedman	5934	Goodenia elderi	subg. Monochila sect. Monochila subsect. Monochila	Monochila
submitted to GB	JQ711652	JQ682654	Goodenia elongata Labill.	130	CANB 645228	I. Crawford	7038	Goodenia elongata	subg. Porphyranthus sect. Ebracteolatae	Ebracteolatae I
MN842373	JQ711695	JQ682834	Goodenia eremophila E.Pritz.	S54	CBG 7908106	J. Taylor	495	Goodenia eremophila	subg. Monochila sect. Scaevolina	Scaevolina
	MN842572	MN831726	Goodenia eremophila E.Pritz.	477	PERTH 07309317	J. Law	59	Goodenia eremophila	subg. Monochila sect. Scaevolina	Scaevolina
MN842374	MN842573	MN831727	Goodenia expansa A.E.Holland & T.P.Boyle	663	BRI AQ0842472	J. Wang	JW175	Goodenia expansa	subg. Goodenia sect. Rosulatae	Goodenia ss II_I
submitted to GB	JQ711686	JQ682750	Goodenia fasciculata (Benth.) Carolin	S51	CBG 8505203	R. Hamilton, M. Hamilton	67	Goodenia fasciculata	subg. Monochila sect. Monochila subsect. Infracta	Monochila
submitted to GB	JQ711693	JQ682689	Goodenia faucium Carolin	S70	CANB 359138	P.K. Latz	7521	Goodenia faucium	subg. Porphyranthus sect. Ebracteolatae	Ebracteolatae II
MN842375		MN831728	Goodenia filiformis R.Br.	802	PERTH 09198237	K.A. Shepherd, C. Wilkins, J.A. Wege	KS 1497	Goodenia filiformis	subg. Porphyranthus sect. Ebracteolatae	Ebracteolatae I
submitted to GB	KT724267	KT750316	Goodenia filiformis R.Br.	838	KPBG 19920683	K.A. Shepherd, S.R. Willis	KS1529	Goodenia filiformis	subg. Porphyranthus sect. Ebracteolatae	Ebracteolatae I
MN842376	JQ711648	JQ682739	Goodenia fordiana Carolin	S55	CBG 9504107	P. Gilmour	7360	Goodenia fordiana	subg. Goodenia sect. Rosulatae	Goodenia ss II_I
MN842377	MN842574	MN831729	Goodenia forrestii F.Muell.	322	PERTH 08090394	G. Byrne	3528	Goodenia forrestii	subg. Porphyranthus sect. Ebracteolatae	Ebracteolatae II
MN842378		JQ682712	Goodenia geniculata R.Br.	S50	CBG 8907556	D.J.E. Whibley	9501	Goodenia geniculata	subg. Goodenia sect. Rosulatae	Goodenia ss II_I
MN842379	MN842575	MN831730	Goodenia gibbosa Carolin	664	DNA D0198272	P.K. Latz	25512	Goodenia gibbosa	subg. Porphyranthus sect. Ebracteolatae	Ebracteolatae II
	JQ711554	JQ682765	Goodenia gibbosa Carolin	S52	CANB 385746	M. Lazarides, J. Palmer	381	Goodenia gibbosa	subg. Porphyranthus sect. Ebracteolatae	Ebracteolatae II
MN842381	JQ711577	JQ682829	Goodenia glabra R.Br.	S49	CBG 8312421	E.M. Canning	5822	Goodenia glabra	subg. Goodenia sect. Rosulatae	Goodenia ss II_I
MN842380	MN842576	MN831731	Goodenia glabra R.Br.	433	PERTH 07339119	P.K. Latz	20720	Goodenia glabra	subg. Goodenia sect. Rosulatae	Goodenia ss II_I
AY102792			Goodenia glabra R.Br.		US 3068441	Robinson et al.	86-0199	Goodenia glabra	subg. Goodenia sect. Rosulatae	Goodenia ss II_I
MN842382	MN842577	MN831732	Goodenia glandulosa K.Krause	323	PERTH 06756379	P.K. Latz	17923	Goodenia glandulosa	subg. Porphyranthus sect. Ebracteolatae	Ebracteolatae II
		MN831733	Goodenia glareicola Carolin	434	PERTH 05604370	F. Obbens, R. Davis, L. Sage	FO 333/98	Goodenia glareicola	subg. Monochila sect. Coeruleae	Coerulea
MN842383		MN831734	Goodenia glareicola Carolin	552	PERTH 08345236	A.M. Coates	3457	Goodenia glareicola	subg. Monochila sect. Coeruleae	Coerulea
submitted to GB	JQ711682	JQ682738	Goodenia glauca F.Muell.	S44	CANB 463105	T. Lally	325	Goodenia glauca	subg. Porphyranthus sect. Ebracteolatae	Ebracteolatae I
MN842384			Goodenia gloeophylla Carolin	858	MEL 277846	M.A. Barritt	1339	Goodenia gloeophylla	subg. Porphyranthus sect. Porphyranthus	Porphyranthus II
submitted to GB	JQ711691	JQ682826	Goodenia glomerata Maiden & Betche	S69	CANB 6206004	J. McAuliffe	190	Goodenia glomerata	subg. Monochila sect. Tetraphylax	Tetrathylax
MN842385	JQ711694	JQ682718	Goodenia goodeniacea (F.Muell.) Carolin	S53	CANB 661940.1	B.J. Lepschi	4808	Goodenia goodeniacea	subg. Goodenia sect. Rosulatae	Goodenia ss II_II
		MN831735	Goodenia goodeniacea (F.Muell.) Carolin	656	PERTH 05225027	A.A. Mitchell	PRP 1194	Goodenia goodeniacea	subg. Goodenia sect. Rosulatae	Goodenia ss II_II
MN842386	MN842578		Goodenia gracilis R.Br.	693	DNA A0101824	D.E. Albrecht, R.K. Harwood	9809	Goodenia gracilis	subg. Porphyranthus sect. Porphyranthus	Porphyranthus II
		MN831736	Goodenia grandiflora Sims	438	PERTH 08305145	D.E. Albrecht, P.K. Latz	11010	Goodenia grandiflora	subg. Goodenia sect. Goodenia	Goodenia ss I_II
MN842320	MN842546	MN831682	Goodenia aff. grandiflora Sims	755	DNA D0171642	K.G. Brennan	6598		subg. Goodenia sect. Goodenia	Goodenia ss I_II
MN842319		MN831683	Goodenia aff. grandiflora Sims	S21	CBG 9005886	M. Parris	9695		subg. Goodenia sect. Goodenia	Goodenia ss I_II
MN842387	MN842579	MN831737	Goodenia granitica L.W.Sage & K.A.Sheph.	324	PERTH 07959796	B. Lullfitz	BRL 074	Goodenia granitica	subg. Porphyranthus sect. Ebracteolatae	Ebracteolatae I
MN842388	MN842580	MN831738	Goodenia gypsicola Symon	325	PERTH 06765203	S. van Leeuwen	4957	Goodenia gypsicola	subg. Porphyranthus sect. Porphyranthus	Porphyranthus I
MN842389		MN831739	Goodenia gypsicola Symon	860	PERTH 5697751	D.J. Edinger, B. Backhouse, G. Marsh	DJE 2193	Goodenia gypsicola	subg. Porphyranthus sect. Porphyranthus	Porphyranthus I
MN842391	MN842581	MN831740	Goodenia halophila Albr.	772	PERTH 06751032	P.K. Latz	18187	Goodenia halophila	subg. Porphyranthus sect. Porphyranthus	Porphyranthus I
MN842390			Goodenia halophila Albr.	672	DNA D0147782	J.A. Risler, N. Brolsma	1003	Goodenia halophila	subg. Porphyranthus sect. Porphyranthus	Porphyranthus I
MN842392	MN842582	MN831741	Goodenia hartiana L.W.Sage	326	PERTH 07963734	S. Santich	s.n.	Goodenia hartiana	subg. Monochila sect. Scaevolina	Scaevolina
MN842393	MN842583	MN831742	Goodenia hassallii F.Muell.	440	PERTH 07251076	S. Patrick	5017	Goodenia hassallii	subg. Monochila sect. Coeruleae	Coerulea
submitted to GB	KT724250	KT750306	Goodenia havilandii Maiden & Betche	S143	NY	Greuter	s.n.	Goodenia havilandii	subg. Porphyranthus sect. Ebracteolatae	Ebracteolatae I
MN842394		MN831743	Goodenia heatheriana L.W.Sage	773	PERTH 05105307	B.A. Fuhrer	97/28	Goodenia heatheriana	subg. Porphyranthus sect. Ebracteolatae	Ebracteolatae I
MN842395	MN842584	MN831744	Goodenia hederacea subsp. alpestris (K.Krause) Carolin	S142	NY	Bernhardt	V90	Goodenia hederacea subsp. alpestris	subg. Goodenia sect. Rosulatae	Goodenia ss II_II
MN842397			Goodenia hederacea Sm. subsp. hederacea	S141	NSW 279349	A.J. Whalen, R.G. Coveny	63	Goodenia hederacea subsp. hederacea	subg. Goodenia sect. Rosulatae	Goodenia ss II_II
MN842396	MN842585		Goodenia hederacea Sm. subsp. hederacea	694	MEL 2199263	J.R. Hosking	2169	Goodenia hederacea subsp. hederacea	subg. Goodenia sect. Rosulatae	Goodenia ss II_II
MN842398	MN842586	MN831745	Goodenia helmsii (E.Pritz.) Carolin	393	PERTH 07641915	J.M. Collins	148	Goodenia helmsii	subg. Monochila sect. Monochila subsect. Infracta	Monochila
		MN831746	Goodenia helmsii (E.Pritz.) Carolin	808	PERTH 08132127	K.A. Shepherd	KS 984	Goodenia helmsii	subg. Monochila sect. Monochila subsect. Infracta	Monochila
MN842399	MN842587	MN831747	Goodenia heppleana (W.Fitzg.) Carolin	442	PERTH	M.D. Barrett	MDB 3414	Goodenia heppleana	subg. Porphyranthus sect. Ebracteolatae	Ebracteolatae II
MN842400	MN842588	MN831748	Goodenia heterochila F.Muell.	328	PERTH 06143830	D.J. Edinger et al.	DJE 3144	Goodenia heterochila	subg. Porphyranthus sect. Ebracteolatae	Ebracteolatae II
MN842401	MN842589	MN831749	Goodenia heteromera F.Muell.	394	DNA A0110895	P.K. Latz	21631	Goodenia heteromera	subg. Porphyranthus sect. Ebracteolatae	Ebracteolatae I
MN842402			Goodenia heterophylla subsp. eglandulosa Carolin	729	MEL 2193232	F.J. Breteler	9184	Goodenia heterophylla subsp. egalndulosa	subg. Goodenia sect. Rosulatae	Goodenia ss II_II
MN842403	MN842590	MN831750	Goodenia heterotricha M.D. Barrett & R.L. Barrett	861	PERTH 8615314	R. Butcher, A.N. Start	1611	Goodenia heterotricha	subg. Porphyranthus sect. Ebracteolatae	Ebracteolatae II
MN842404	MN842593	MN831751	Goodenia hirsuta F.Muell.	329	PERTH 06756549	P.K. Latz, B. Wright	18838	Goodenia hirsuta	subg. Porphyranthus sect. Ebracteolatae	Ebracteolatae II
	MN842591	MN831752	Goodenia hirsuta subsp. Hills (P.K.Latz 13679)	756	DNA A89784	P.K. Latz	13679		subg. Porphyranthus sect. Ebracteolatae	Ebracteolatae II
MN842405	MN842592	MN831753	Goodenia hirsuta subsp. Run-on areas (P.K.Latz 1216)	757	DNA D0217260	D.L. Lewis	1964		subg. Porphyranthus sect. Ebracteolatae	Ebracteolatae II
MN842406	MN842594		Goodenia hispida R.Br.	697	DNA D0220877	B. Wirf	761	Goodenia hispida	subg. Porphyranthus sect. Ebracteolatae	Ebracteolatae II
MN842407			Goodenia holtzeana (Specht) Carolin	698	DNA D0218090	S. Hirst	196	Goodenia holtzeana	subg. Porphyranthus sect. Ebracteolatae	Ebracteolatae II
MN842408			Goodenia holtzeana (Specht) Carolin	S138	MEL 1598702A	A.A. Munir	5618	Goodenia holtzeana	subg. Porphyranthus sect. Ebracteolatae	Ebracteolatae II
MN842409	MN842595	MN831754	Goodenia humilis R.Br.	555	MEL 2103450	V. Stajsic	1488	Goodenia humilis	subg. Porphyranthus sect. Porphyranthus	Porphyranthus II
MN842410		MN831755	Goodenia incana R.Br.	862	PERTH 5997275	R.J. Cranfield	16084	Goodenia incana	subg. Monochila sect. Coeruleae	Coerulea
		MN831756	Goodenia integerrima Carolin	445	PERTH 04926838	D. Papenfus	DP 730	Goodenia integerrima	subg. Porphyranthus sect. Ebracteolatae	Ebracteolatae I
MN842411			Goodenia inundata L.W.Sage & Pigott	863	PERTH 05253969	A.A. Mitchell	4382	Goodenia inundata	subg. Porphyranthus sect. Ebracteolatae	Ebracteolatae II
submitted to GB	KT724256	KT750285	Goodenia iyouta Carolin	721	PERTH 08305390	P.K. Latz	17843	Goodenia iyouta	subg. Porphyranthus sect. Ebracteolatae	Ebracteolatae II
MN842412			Goodenia iyouta Carolin	751	PERTH 02647109	A.S. Mitchell	989	Goodenia iyouta	subg. Porphyranthus sect. Ebracteolatae	Ebracteolatae II
MN842413		MN831757	Goodenia janamba Carolin	446	PERTH 04108965	K.F. Kenneally	11582	Goodenia janamba	subg. Porphyranthus sect. Ebracteolatae	Ebracteolatae II
submitted to GB	KT724254	KT750292	Goodenia janamba Carolin	732	DNA D0197388	D.L. Lewis	1341	Goodenia janamba	subg. Porphyranthus sect. Ebracteolatae	Ebracteolatae II
MN842414		MN831758	Goodenia jaurdiensis L.W.Sage	932	PERTH 8596867	A.I. Craigie	156 / 001	Goodenia jaurdiensis	subg. Porphyranthus sect. Ebracteolatae	Ebracteolatae I
MN842321			Goodenia aff. jaurdiensis L.W.Sage	934	PERTH 09018697	M. Hislop	4547		subg. Porphyranthus sect. Ebracteolatae	Ebracteolatae I
MN842415	MN842596	MN831759	Goodenia kakadu Carolin	682	DNA D0182791	D. Wilson	s.n.	Goodenia kakadu	subg. Porphyranthus sect. Porphyranthus	Porphyranthus I
MN842416		MN831760	Goodenia katabudjar Cranfield & L.W.Sage	330	PERTH 04898788	L.W. Sage	1024	Goodenia katabudjar	subg. Monochila sect. Coeruleae	Coerulea
MN842417	MN842597	MN831761	Goodenia kingiana Carolin	448	PERTH 08142254	R. Davis	11376	Goodenia kingiana	subg. Goodenia sect. Goodenia	Goodenia ss I_II
		MN831762	Goodenia krauseana Carolin	449	PERTH 06538118	R. Davis	10646	Goodenia krauseana	subg. Porphyranthus sect. Ebracteolatae	Ebracteolatae I
MN842418	JQ711607	JQ682667	Goodenia laevis subsp. humifusa L.W.Sage	188	PERTH 4003799	M.H.G. Gustafsson, K. Bremer	134	Goodenia laevis subsp. humifusa	subg. Goodenia sect. Goodenia	Goodenia ss I_I
MN842419		MN831763	Goodenia laevis subsp. humifusa L.W.Sage	331	PERTH 07898444	J.A. Cochrane	JAC 6181	Goodenia laevis subsp. humifusa	subg. Goodenia sect. Goodenia	Goodenia ss I_I
MN842420		MN831764	Goodenia laevis Benth. subsp. laevis	450	PERTH 05400562	R. Davis	8810	Goodenia laevis subsp. laevis	subg. Goodenia sect. Goodenia	Goodenia ss I_I
MN842421	MN842598	MN831765	Goodenia lamprosperma F.Muell.	451	PERTH 08364001	V. Long, M.D. Barrett	VL Burrup 11-01	Goodenia lamprosperma	subg. Porphyranthus sect. Porphyranthus	Porphyranthus I
submitted to GB	KT724273	KT750289	Goodenia lamprosperma F.Muell.	699	DNA D0214822	K. Brennan	9561	Goodenia lamprosperma	subg. Porphyranthus sect. Porphyranthus	Porphyranthus I
MN842422			Goodenia lanata R.Br.	S136	NY	A. Meebold	6523	Goodenia lanata	subg. Goodenia sect. Rosulatae	Goodenia ss II_I
MN842423	MN842599	MN831766	Goodenia larapinta Tate	556	MEL 278193	P.K. Latz	12383	Goodenia larapinta	subg. Porphyranthus sect. Ebracteolatae	Ebracteolatae II
		MN831767	Goodenia leiosperma Carolin	452	PERTH 02608774	G.M. Chippendale	7649	Goodenia leiosperma	subg. Porphyranthus sect. Ebracteolatae	Ebracteolatae II
MN842424	MN842600	MN831768	Goodenia leiosperma Carolin	733	MEL 1597356	I.D. Cowie, P.F. Munns	1576	Goodenia leiosperma	subg. Porphyranthus sect. Ebracteolatae	Ebracteolatae II
MN842425	MN842601	MN831769	Goodenia lineata J.H.Willis	557	MEL 2338172	J.A. Jeanes	2515	Goodenia lineata	subg. Monochila sect. Tetraphylax	Tetrathylax
submitted to GB	KT724215	KT750283	Goodenia lineata J.H.Willis	759	MEL 2325876	J.A. Jeanes, G. Lay	2286	Goodenia lineata	subg. Monochila sect. Tetraphylax	Tetrathylax
		MN831770	Goodenia lobata Ising	884	CBG 8908344	J.Z. Weber	9654	Goodenia lobata	subg. Porphyranthus sect. Ebracteolatae	Ebracteolatae I
MN842427	MN842602	MN831772	Goodenia lunata J.M.Black	S71	CBG 8907384	N.N. Donner	6686	Goodenia lunata	subg. Porphyranthus sect. Ebracteolatae	Ebracteolatae I
MN842426		MN831771	Goodenia lunata J.M.Black	734	DNA A0090244	D.E. Albrecht	5478	Goodenia lunata	subg. Porphyranthus sect. Ebracteolatae	Ebracteolatae I
MN842428		MN831773	Goodenia lunata J.M.Black	558	PERTH 08305560	P.K. Latz	17896	Goodenia lyrata	subg. Porphyranthus sect. Porphyranthus	Porphyranthus I
MN842322	MN842547		Goodenia aff. lyrata Carolin	746	PERTH 06756204	P.K. Latz	17871				NOT IN TREE
		MN831774	Goodenia macbarronii Carolin	559	MEL 2203728	R. Thomas	751	Goodenia macbarronii	subg. Porphyranthus sect. Porphyranthus	Porphyranthus II
MN842429	MN842603	MN831775	Goodenia macbarronii Carolin	885	CANB 773855.1	R.W. Purdie	6704	Goodenia macbarronii	subg. Porphyranthus sect. Porphyranthus	Porphyranthus II
MN842430		MN831776	Goodenia macmillanii F.Muell.	560	MEL 2314230	N.G. Walsh, F. Coates, D. Roberts	6723	Goodenia macmillanii	subg. Goodenia sect. Goodenia	Goodenia ss I_II
MN842431	MN842604	MN831777	Goodenia macroplectra (F.Muell.) Carolin	454	PERTH 06752314	S. Patrick et al.	4741 D	Goodenia macroplectra	subg. Porphyranthus sect. Ebracteolatae	Ebracteolatae II
submitted to GB	JQ711576	JQ682696	Goodenia macroplectra (F.Muell.) Carolin	197	PERTH 02608995	R.J. Cranfield	7667	Goodenia macroplectra	subg. Porphyranthus sect. Ebracteolatae	Ebracteolatae II
MN842432	MN842605	MN831778	Goodenia maideniana W.Fitzg.	561	MEL 279357	D.E. Albrecht	6186	Goodenia maideniana	subg. Porphyranthus sect. Ebracteolatae	Ebracteolatae I
			Goodenia maideniana W.Fitzg.	809	MEL 279357	D.E. Albrecht	6186	Goodenia maideniana	subg. Porphyranthus sect. Ebracteolatae	Ebracteolatae I
MN842433	MN842606		Goodenia malvina Carolin	701	DNA D0160341	I.D. Cowie	9868	Goodenia malvina	subg. Porphyranthus sect. Ebracteolatae	Ebracteolatae II
MN842434	MN842607		Goodenia malvina Carolin	702	DNA D0191380	I.D. Cowie	12351	Goodenia malvina	subg. Porphyranthus sect. Ebracteolatae	Ebracteolatae II
MN842435		MN831779	Goodenia maretensis R.L. Barrett	864	PERTH 8615330	R.L. Barrett	RLB 8381	Goodenia maretensis	subg. Porphyranthus sect. Ebracteolatae	Ebracteolatae I
MN842436	MN842608	MN831780	Goodenia megasepala Carolin	778	BRI AQ611153	A.R. Bean	22385	Goodenia megasepala	subg. Porphyranthus sect. Ebracteolatae	Ebracteolatae I
MN842437	MN842609	MN831781	Goodenia micrantha Hemsl. ex Carolin	455	PERTH 09198261	K.A. Shepherd, C. Wilkins, J.A. Wege	KS 1484	Goodenia micrantha	subg. Porphyranthus sect. Ebracteolatae	Ebracteolatae I
submitted to GB	JQ711663	JQ682732	Goodenia microptera F.Muell.	S43	NSW 4111324	A.A. Mitchell	PRP516	Goodenia microptera	subg. Porphyranthus sect. Ebracteolatae	Ebracteolatae I
MN842441		MN831784	Goodenia mimuloides S.Moore	928	PERTH 05323886	N. Gibson, M. Lyons	3595	Goodenia mimuloides	subg. Porphyranthus sect. Ebracteolatae	Ebracteolatae I
MN842440		MN831783	Goodenia mimuloides S.Moore	924	PERTH 09200401	K.A. Shepherd	KS 1550	Goodenia mimuloides	subg. Porphyranthus sect. Ebracteolatae	Ebracteolatae I
MN842438			Goodenia mimuloides S.Moore	304	PERTH 08293767	R. Davis	RD 11770	Goodenia mimuloides	subg. Porphyranthus sect. Ebracteolatae	Ebracteolatae I
MN842439	MN842610	MN831782	Goodenia mimuloides S.Moore	562	PERTH 08389160	W.A. Thompson, J. Allen	1628	Goodenia mimuloides	subg. Porphyranthus sect. Ebracteolatae	Ebracteolatae I
MN842442	MN842611		Goodenia minutiflora F.Muell.	703	DNA D0188856	I.D. Cowie	12021	Goodenia minutiflora	subg. Porphyranthus sect. Porphyranthus	Porphyranthus I
		MN831786	Goodenia modesta J.M.Black	747	PERTH 05697174	D.J. Edinger, B. Backhouse, G. Marsh	DJE 2157 A	Goodenia modesta	subg. Porphyranthus sect. Porphyranthus	Porphyranthus I
MN842443			Goodenia modesta J.M.Black	333	PERTH 06473113	S. van Leeuwen	4873	Goodenia modesta	subg. Porphyranthus sect. Porphyranthus	Porphyranthus I
MN842444	MN842612	MN831785	Goodenia modesta J.M.Black	564	MEL 2342174	N.G. Walsh	7080	Goodenia modesta	subg. Porphyranthus sect. Porphyranthus	Porphyranthus I
	MN842613	MN831787	Goodenia mueckeana F.Muell.	801	DNA D0142556	R.A. Kerrigan, I. Risler	228	Goodenia mueckeana	subg. Goodenia sect. Rosulatae	Goodenia ss II_II
	JQ711540	JQ682755	Goodenia muelleriana Carolin	S39	PERTH 05823145	A.A. Mitchell	PRP 181	Goodenia muelleriana	subg. Porphyranthus sect. Ebracteolatae	Ebracteolatae II
MN842445	MN842614	MN831788	Goodenia neglecta (Carolin) Carolin	667	DNA D0186002	K.G. Brennan	7527	Goodenia neglecta	subg. Porphyranthus sect. Ebracteolatae	Ebracteolatae II
MN842446	MN842615	MN831789	Goodenia neogoodenia Carolin	334	PERTH 05509920	S. Patrick	3166	Goodenia neogoodenia	subg. Porphyranthus sect. Porphyranthus	Porphyranthus I
submitted to GB	KT724214	KT750293	Goodenia nigrescens Carolin	668	DNA D0134468	C.R. Michell, R.B. Carrow	1323	Goodenia nigrescens	subg. Porphyranthus sect. Ebracteolatae	Ebracteolatae II
submitted to GB	JQ711696	JQ682710	Goodenia nuda E.Pritz.	S41	NSW 411219	A. A. Mitchell	PRP 547	Goodenia nuda	subg. Porphyranthus sect. Ebracteolatae	Ebracteolatae I
MN842447	MN842616		Goodenia occidentalis Carolin	336	PERTH 09198393	K.A. Shepherd, C. Wilkins, J.A. Wege	KS 1452	Goodenia occidentalis	subg. Porphyranthus sect. Ebracteolatae	Ebracteolatae I
		MN831684	Goodenia aff. occidentalis Carolin	456	PERTH 07985967	D.J. Edinger	6055 A		subg. Porphyranthus sect. Ebracteolatae	Ebracteolatae I
		MN831790	Goodenia ochracea Carolin	457	PERTH 05266394	S.J. Claymore, A.S. Weston	122	Goodenia ochracea	subg. Porphyranthus sect. Ebracteolatae	Ebracteolatae I
MN842448			Goodenia odonnellii F.Muell.	704	DNA D0201127	I.D. Cowie, B. Stuckey	12734	Goodenia odonnellii	subg. Porphyranthus sect. Ebracteolatae	Ebracteolatae II
MN842449	MN842617	MN831791	Goodenia odonnellii F.Muell. 'Sandstone form'	735	DNA D0160387	I.D. Cowie	9897		subg. Porphyranthus sect. Ebracteolatae	Ebracteolatae II
MN842450	MN842618	MN831792	Goodenia odonnellii F.Muell. 'Victoria River form'	736	DNA D0191128	I.D. Cowie	12283		subg. Porphyranthus sect. Ebracteolatae	Ebracteolatae II
MN842451		MN831793	Goodenia ovata Sm.	687	MEL 288689	D. Halford	Q 3442	Goodenia ovata	subg. Goodenia sect. Goodenia	Goodenia ss I_I
MN842452		MN831794	Goodenia pascua Carolin	460	PERTH 06626521	M.E. Trudgen	MET 18849	Goodenia pascua	subg. Porphyranthus sect. Ebracteolatae	Ebracteolatae I
MN842323	MN842548	MN831685	Goodenia aff. pascua Carolin	399	PERTH 07561636	S. van Leeuwen	4718		subg. Porphyranthus sect. Ebracteolatae	Ebracteolatae I
MN842324		MN831686	Goodenia aff. pascua Carolin	763	PERTH 06022405	M.E. Trudgen, S.M. Maley	MET 10658		subg. Porphyranthus sect. Ebracteolatae	Ebracteolatae I
	MN842619	MN831795	Goodenia peacockiana Carolin	799	MEL 2014052	M.G. Corrick	10882	Goodenia peacockiana	subg. Goodenia sect. Rosulatae	Goodenia ss II_I
	MN842620	MN831796	Goodenia peacockiana Carolin	865	PERTH 07153090	G. Byrne	280	Goodenia peacockiana	subg. Goodenia sect. Rosulatae	Goodenia ss II_I
MN842453		MN831797	Goodenia pedicellata L.W.Sage & K.W.Dixon	907	PERTH	L.W. Sage	LSW 2885	Goodenia pedicellata	subg. Porphyranthus sect. Ebracteolatae	Ebracteolatae I
		MN831798	Goodenia perryi Carolin	866	PERTH 0325187	R.J. Cranfield	8525	Goodenia perryi	subg. Monochila sect. Coeruleae	Coerulea
MN842454	KT724238	KT750308	Goodenia phillipsiae Carolin	836	KP 20100889	K.A. Shepherd, S.R. Willis	KS1527	Goodenia phillipsiae	subg. Goodenia sect. Goodenia	Goodenia ss I_I
MN842455	MN842621	MN831799	Goodenia pilosa (R.Br.) Carolin	567	MEL 2330416	I.D. Cowie	12413	Goodenia pilosa subsp. pilosa	subg. Porphyranthus sect. Ebracteolatae	Ebracteolatae II
MN842456	MN842622	MN831801	Goodenia pinifolia de Vriese	568	MEL 2017076	B.H. Smith	1452	Goodenia pinifolia	subg. Monochila sect. Monochila subsect. Monochila	Monochila
		MN831800	Goodenia pinifolia de Vriese	812	PERTH 07987919	B.L. Rye, M.E. Trudgen	BLR 241116	Goodenia pinifolia	subg. Monochila sect. Monochila subsect. Monochila	Monochila
MN842457			Goodenia pinnatifida Schltdl.	175	AD 97843405	E. Brown	28.9.1978	Goodenia pinnatifida	subg. Porphyranthus sect. Ebracteolatae	Ebracteolatae I
MN842458	MN842623	MN831802	Goodenia pinnatifida Schltdl.	463	PERTH	R. Chinnock, S. Chinnock	RJC 10348	Goodenia pinnatifida	subg. Porphyranthus sect. Ebracteolatae	Ebracteolatae I
MN842459		MN831803	Goodenia pinnatifida Schltdl.	899	PERTH 07980434	B. Barton	8	Goodenia pinnatifida	subg. Porphyranthus sect. Ebracteolatae	Ebracteolatae I
MN842460		MN831804	Goodenia pinnatifida Schltdl. 'glabrous sepals'	895	BRI AQ634550	A.R. Bean	8293		subg. Porphyranthus sect. Ebracteolatae	Ebracteolatae I
MN842325		MN831687	Goodenia aff. pinnatifida Schltdl.	919	PERTH 07362366	R. Davis	11113		subg. Porphyranthus sect. Ebracteolatae	Ebracteolatae I
MN842461			Goodenia porphyrea (Carolin) Carolin	737	DNA D0139803	R.K. Harwood	892	Goodenia porphyrea	subg. Porphyranthus sect. Ebracteolatae	Ebracteolatae II
MN842462	MN842624		Goodenia potamica Carolin	669	DNA D0196038	K. Brennan	8091	Goodenia potamica	subg. Porphyranthus sect. Ebracteolatae	Ebracteolatae II
submitted to GB	KT724258	KT750313	Goodenia prostrata Carolin	464	PERTH	R. Chinnock, S. Chinnock	RJC 10292	Goodenia prostrata	subg. Porphyranthus sect. Ebracteolatae	Ebracteolatae II
		MN831806	Goodenia psammophila subsp. hiddinsiana L.W.Sage & M.D.Barrett	337	PERTH 07007647	M.D. Barrett	1446	Goodenia psammophila subsp. hiddinsiana	subg. Porphyranthus sect. Ebracteolatae	Ebracteolatae II
	MN842625	MN831807	Goodenia psammophila subsp. hiddinsiana L.W.Sage & M.D.Barrett	465	PERTH	R.L. Barrett	RLB 6502	Goodenia psammophila subsp. hiddinsiana	subg. Porphyranthus sect. Ebracteolatae	Ebracteolatae II
MN842464		MN831805	Goodenia psammophila L.W.Sage & M.D.Barrett subsp. psammophila	738	PERTH 05554233	R.L. Barrett, M.D. Barrett	s.n.	Goodenia psammophila subsp. psammophila	subg. Porphyranthus sect. Ebracteolatae	Ebracteolatae II
MN842463			Goodenia psammophila subsp. nov	706	DNA D0178669	R.A. Kerrigan	1069		subg. Porphyranthus sect. Ebracteolatae	Ebracteolatae II
	JQ711550	JQ682797	Goodenia pterigosperma R.Br.	198	PERTH 04003845	M.H.G. Gustafsson, K. Bremer	KB148	Goodenia pterigosperma	subg. Monochila sect. Coeruleae	Coerulea
	MN842626	MN831808	Goodenia pterigosperma R.Br.	867	PERTH 09200347	K.A. Shepherd, J.A. Wege	KS1581	Goodenia pterigosperma	subg. Monochila sect. Coeruleae	Coerulea
	KT724261	KT750287	Goodenia pulchella Benth. subsp. pulchella	765	PERTH 07436157	J.E. Wajon	1246	Goodenia pulchella	subg. Porphyranthus sect. Ebracteolatae	Ebracteolatae I
MN842465		MN831810	Goodenia pulchella subsp. Coastal Plain B (L.W. Sage 2336)	467	PERTH 07576293	R. Davis	11288		subg. Porphyranthus sect. Ebracteolatae	Ebracteolatae I
MN842466			Goodenia pulchella subsp. Mt Barker (K.F. Kenneally 1166)	764	PERTH 01187090	K.F. Kenneally	6458		subg. Porphyranthus sect. Ebracteolatae	Ebracteolatae I
MN842467		MN831809	Goodenia pulchella subsp. Wheatbelt (L.W. Sage & F. Hort 795)	766	PERTH 05826829	L.W. Sage, F. Obbens	LWS 1059		subg. Porphyranthus sect. Ebracteolatae	Ebracteolatae I
	KT724224	KT750324	Goodenia pumilio R.Br.	782	DNA D0215473	D.L. Lewis, J. Harding	2127	Goodenia pumilio	subg. Porphyranthus sect. Porphyranthus	Porphyranthus I
		MN831811	Goodenia purpurascens R.Br.	565	MEL 1619509	I.D. Cowie	5090	Goodenia purpurascens	subg. Porphyranthus sect. Porphyranthus	Porphyranthus I
submitted to GB	KT724233	KT750297	Goodenia purpurascens R.Br.	707	DNA D0217786	D. Napier	314	Goodenia purpurascens	subg. Porphyranthus sect. Porphyranthus	Porphyranthus I
submitted to GB	KT724271	KT750274	Goodenia purpurea (F.Muell.) Carolin	570	MEL 2016671	P.C. Jobson	1356	Goodenia purpurea	subg. Porphyranthus sect. Ebracteolatae	Ebracteolatae II
		MN831812	Goodenia pusilla (de Vriese) de Vriese	813	KPBG 20010533	C. Turley	s.n.	Goodenia pusilla	subg. Porphyranthus sect. Ebracteolatae	Ebracteolatae I
	JQ711635	JQ682751	Goodenia pusilliflora F.Muell.	166	AD 98434789	D.E. Symon	4292	Goodenia pusilliflora	subg. Porphyranthus sect. Ebracteolatae	Ebracteolatae I
MN842326		MN831688	Goodenia aff. pusilliflora F.Muell.	921	PERTH 09200436	K.A. Shepherd	KS 1552		subg. Porphyranthus sect. Ebracteolatae	Ebracteolatae I
MN842468	KT724245	MN831813	Goodenia quadrifida (Carolin) Carolin	886	CBG 8311186	J.D. Briggs	944	Goodenia quadrifida	subg. Porphyranthus sect. Ebracteolatae	Ebracteolatae II
MN842469	MN842627	MN831815	Goodenia quadrilocularis R.Br.	849	PERTH 07222467	J.A. Cochrane, R. Butler, C. Turley, W. Williams	JAC 4912	Goodenia quadrilocularis	subg. Monochila sect. Tetraphylax	Tetrathylax
		MN831814	Goodenia quadrilocularis R.Br.	783	PERTH 05035651	B.J. Lepschi, B.A. Fuhrer	BJL 3837	Goodenia quadrilocularis	subg. Monochila sect. Tetraphylax	Tetrathylax
MN842470	MN842628	MN831816	Goodenia quasilibera Carolin	708	PERTH 06116868	D.J. Edinger et al.	DJE 2972	Goodenia quasilibera	subg. Porphyranthus sect. Ebracteolatae	Ebracteolatae I
	KT724231	KT750322	Goodenia racemosa F.Muell. var. racemosa	571	MEL 282709	A.R. Bean	8957	Goodenia racemosa var. racemosa	subg. Monochila sect. Tetraphylax	Tetrathylax
	KT724246	KT750312	Goodenia ramelii F.Muell.	691	DNA D0214717	K. Brennan	9564	Goodenia ramelii	subg. Monochila sect. Scaevolina	Scaevolina
	KT724239	KT750295	Goodenia redacta Carolin	709	DNA D0218472	I.D. Cowie, J. Palmer	13476	Goodenia redacta	subg. Porphyranthus sect. Ebracteolatae	Ebracteolatae II
MN842471	MN842629	MN831817	Goodenia rosulata Domin	566	MEL 2277013	M.B. Thomas, E.J. Thompson, R.J. Cumming	1760A	Goodenia rosulata	subg. Porphyranthus sect. Porphyranthus	Porphyranthus II
	KT724244	KT750299	Goodenia rosulata Domin	572	MEL 2282381	A.R. Bean	18304	Goodenia rosulata	subg. Porphyranthus sect. Porphyranthus	Porphyranthus II
MN842472	MN842630	MN831818	Goodenia rotundifolia R.Br.	573	MEL 2291736	A.R. Bean	18559	Goodenia rotundifolia	subg. Goodenia sect. Rosulatae	Goodenia ss II_II
		MN831819	Goodenia salina L.W.Sage & K.A.Sheph.	479	PERTH 05593735	C. Walter	87	Goodenia salina	subg. Porphyranthus sect. Ebracteolatae	Ebracteolatae I
MN842473	MN842631	MN831821	Goodenia scaevolina F.Muell.	480	PERTH 07564082	G. Byrne	1490	Goodenia scaevolina	subg. Monochila sect. Scaevolina	Scaevolina
MN842474	MN842632	MN831820	Goodenia scaevolina F.Muell.	739	DNA D0184219	K.G. Brennan, T.A. Calnan	7382	Goodenia scaevolina	subg. Monochila sect. Scaevolina	Scaevolina
MN842475	MN842633	MN831822	Goodenia scapigera subsp. graniticola L.W.Sage	481	PERTH 07782136	J.A. Cochrane, B. Davis	JAC 6911	Goodenia scapigera subsp. graniticola	subg. Monochila sect. Monochila subsect. Monochila	Monochila
MN842476		MN831823	Goodenia scapigera R.Br. subsp. scapigera	482	PERTH 07054157	L. Sweedman	6466	Goodenia scapigera subsp. scapigera	subg. Monochila sect. Monochila subsect. Monochila	Monochila
MN842477			Goodenia schwerinensis Carolin	402	PERTH 06473164	S. van Leeuwen	4875	Goodenia schwerinensis	subg. Goodenia sect. Rosulatae	Goodenia ss II_I
MN842478			Goodenia schwerinensis Carolin	740	PERTH 05848687	K.F. Kenneally, D.J. Edinger	K 12193 E 2658	Goodenia schwerinensis	subg. Goodenia sect. Rosulatae	Goodenia ss II_I
	KT724226	KT750305	Goodenia sepalosa F.Muell. ex Benth. var. sepalosa	S128	CANB 332728	P.A. Fryxell, L.A. Craven	4195	Goodenia sepalosa var. sepalosa	subg. Porphyranthus sect. Ebracteolatae	Ebracteolatae II
MN842479	MN842634	MN831824	Goodenia sericostachya C.A.Gardner	874	PERTH 07786557	G. Byrne	2414	Goodenia sericostachya	subg. Monochila sect. Monochila subsect. Monochila	Monochila
	KT724247	KT750275	Goodenia splendida A.E.Holland & T.P.Boyle	785	BRI AQ667858	K.R. McDonald	KRM452	Goodenia splendida	subg. Monochila sect. Scaevolina	Scaevolina
MN842492		MN831837	Goodenia stellata Carolin	490	PERTH 04268407	A.A. Mitchell	PRP 670	Goodenia stellata	subg. Porphyranthus sect. Ebracteolatae	Ebracteolatae II
	KT724232	KT750266	Goodenia stelligera R.Br.	575	MEL 2276995	P.I. Forster	PIF 29042	Goodenia stelligera	subg. Monochila sect. Tetraphylax	Tetrathylax
		MN831838	Goodenia stenophylla F.Muell.	407	PERTH 05095492	E. Tink	106	Goodenia stenophylla	subg. Monochila sect. Monochila subsect. Infracta	Monochila
MN842493			Goodenia stenophylla F.Muell.	786	PERTH 05095492	E. Tink	106	Goodenia stenophylla	subg. Monochila sect. Monochila subsect. Infracta	Monochila
MN842494	KT724280	KT750278	Goodenia stirlingii F.M.Bailey	576	MEL 2291737	P.I. Forster, K.R. McDonald, R. Jenzen	PIF 30928	Goodenia stirlingii	subg. Goodenia sect. Goodenia	Goodenia ss I_II
	KT724241	KT750272	Goodenia stobbsiana F.Muell.	408	PERTH	B. Chinnock, S. Chinnock	RJC 10301	Goodenia stobbsiana	subg. Monochila sect. Scaevolina	Scaevolina
MN842495			Goodenia stobbsiana F.Muell.	870	PERTH	S. Dillon, T. Hammer, K.R. Thiele	SD 7000	Goodenia stobbsiana	subg. Monochila sect. Scaevolina	Scaevolina
MN842327		MN831689	Goodenia aff. stobbsiana F.Muell.	528	PERTH	R.L. Barrett	RLB 6605		subg. Monochila sect. Scaevolina	Scaevolina
MN842496			Goodenia strangfordii F.Muell.	491	PERTH 04794710	D.E. Albrecht	8251	Goodenia strangfordii	subg. Porphyranthus sect. Ebracteolatae	Ebracteolatae I
	KT724276	KT750284	Goodenia strangfordii F.Muell.	803	DNA D0212854	K. Brennan	8545	Goodenia strangfordii	subg. Porphyranthus sect. Ebracteolatae	Ebracteolatae I
MN842497	MN842642	MN831839	Goodenia subauriculata C.T.White	675	DNA D0151590	C.R. Michell	3630	Goodenia subauriculata	subg. Porphyranthus sect. Ebracteolatae	Ebracteolatae II
		MN831840	Goodenia suffrutescens Carolin	409	PERTH 02644304	B. Pellow, D. Keith	17	Goodenia suffrutescens	subg. Monochila sect. Scaevolina	Scaevolina
	KT724242	KT750264	Goodenia tenuiloba F.Muell.	512	PERTH	B. Chinnock, S. Chinnock	RJC 10312	Goodenia tenuiloba	subg. Porphyranthus sect. Ebracteolatae	Ebracteolatae I
		MN831841	Goodenia trichophylla de Vriese ex Benth.	410	PERTH 07816898	S. Kern	11948	Goodenia trichophylla	subg. Monochila sect. Coeruleae	Coerulea
	MN842643	MN831842	Goodenia trichophylla de Vriese ex Benth.	877	PERTH 08292272	G. Byrne	4064	Goodenia trichophylla	subg. Monochila sect. Coeruleae	Coerulea
MN842498	MN842644	MN831844	Goodenia triodiophila Carolin	878	DNA D0217148	D.L. Lewis	1918	Goodenia triodiophila	subg. Porphyranthus sect. Ebracteolatae	Ebracteolatae I
		MN831843	Goodenia triodiophila Carolin	514	PERTH 06473075	S. van Leeuwen	4889	Goodenia triodiophila	subg. Porphyranthus sect. Ebracteolatae	Ebracteolatae I
MN842328		MN831690	Goodenia aff. triodiophila Carolin	515	PERTH 05090091	K.F. Kenneally	12024 A		subg. Porphyranthus sect. Ebracteolatae	Ebracteolatae I
MN842500	MN842645	MN831845	Goodenia tripartita Carolin	516	PERTH 09198369	K.A. Shepherd, C. Wilkins, J.A. Wege	KS 1455	Goodenia tripartita	subg. Goodenia sect. Rosulatae	Goodenia ss II_I
MN842499	JQ711560	JQ682808	Goodenia tripartita Carolin	192	PERTH 4003810	M.H.G. Gustafsson, K. Bremer	126	Goodenia tripartita	subg. Goodenia sect. Rosulatae	Goodenia ss II_I
MN842501		MN831846	Goodenia turleyae L.W.Sage & K.A.Sheph.	517	PERTH 05472652	C.D. Turley	41 VM/1099	Goodenia turleyae	subg. Porphyranthus sect. Ebracteolatae	Ebracteolatae I
		MN831691	Goodenia aff. turleyae L.W.Sage & K.A.Sheph.	518	PERTH 07868383	M.N. Lyons, S.D. Lyons	4022		subg. Porphyranthus sect. Ebracteolatae	Ebracteolatae I
MN842502	MN842646	MN831847	Goodenia valdentata P.J.Lang	S129	AD 99235086	F.J. Badman	5148	Goodenia valdentata	subg. Goodenia sect. Goodenia	Goodenia ss I_II
MN842503	JQ711562	JQ682762	Goodenia varia R.Br.	167	AD 97013242	D.J.E. Whibley	1645	Goodenia varia	subg. Goodenia sect. Goodenia	Goodenia ss I_I
MN842504			Goodenia varia R.Br.	180	AD 95751069	Hj. Eichler	14043	Goodenia varia	subg. Goodenia sect. Goodenia	Goodenia ss I_I
MN842505		MN831848	Goodenia vernicosa J.M.Black	578	MEL 1593778	B. Nordenstam, A. Anderberg	990	Goodenia vernicosa	subg. Goodenia sect. Goodenia	Goodenia ss I_I
MN842506			Goodenia vernicosa J.M.Black	S123	US 2563011	D.N. Kraehenbuehl	770	Goodenia vernicosa	subg. Goodenia sect. Goodenia	Goodenia ss I_I
MN842507			Goodenia vilmoriniae F.Muell.	519	PERTH 06551742	D.J. Edinger, G. Marsh	DJE 3691	Goodenia vilmorinae	subg. Porphyranthus sect. Ebracteolatae	Ebracteolatae I
MN842508	MN842647		Goodenia virgata Carolin	712	DNA D0163419	D.L. Lewis, D.J. Dixon	8	Goodenia virgata	subg. Porphyranthus sect. Ebracteolatae	Ebracteolatae II
MN842509		MN831849	Goodenia viridula Carolin	579	MEL 1616467	E.J. Thompson, B.K. Simon	BUC 350	Goodenia viridula	subg. Goodenia sect. Rosulatae	Goodenia ss II_II
MN842510		MN831850	Goodenia viscida R.Br.	520	PERTH 06235190	C.D. Turley	3/104	Goodenia viscida	subg. Goodenia sect. Goodenia	Goodenia ss I_I
MN842511	KT724279	KT750326	Goodenia viscida R.Br.	845	KP 20050023	K.A. Shepherd, S.R. Willis	KS1536	Goodenia viscida	subg. Goodenia sect. Goodenia	Goodenia ss I_I
MN842512	MN842648		Goodenia viscidula Carolin	745	DNA D0189841	I.D. Cowie	12060	Goodenia viscidula	subg. Porphyranthus sect. Porphyranthus	Porphyranthus I
MN842513	MN842649	MN831851	Goodenia watsonii subsp. glandulosa Carolin	522	PERTH 07948972	M. Hislop, M. Griffiths	WW 236 - 18	Goodenia watsonii subsp. glandulosa	subg. Monochila sect. Monochila subsect. Monochila	Monochila
MN842514	MN842650	MN831852	Goodenia willisiana Carolin	178	AD 95751063	Hj. Eichler	14037	Goodenia willisiana	subg. Goodenia sect. Rosulatae	Goodenia ss II_I
	MN842651	MN831853	Goodenia willisiana Carolin	889	CANB 87580301	R.W. Purdie	9643	Goodenia willisiana	subg. Goodenia sect. Rosulatae	Goodenia ss II_I
	KT724249	KT750294	Goodenia wilunensis Carolin	580	PERTH 07737297	R. Meissner, B. Bayliss	895	Goodenia wilunensis	subg. Porphyranthus sect. Ebracteolatae	Ebracteolatae I
MN842515	MN842652	MN831854	Goodenia wilunensis Carolin	879	PERTH	B. Chinnock, S. Chinnock	RJC 10285	Goodenia wilunensis	subg. Porphyranthus sect. Ebracteolatae	Ebracteolatae I
MN842516	MN842653	MN831855	Goodenia xanthosperma F.Muell.	524	PERTH 08067198	S. Barrett	1769	Goodenia xanthosperma	subg. Goodenia sect. Rosulatae	Goodenia ss II_II
MN842517			Goodenia xanthotricha de Vriese	847	PERTH 08359792	F. Hort, J. Hort	FH 3705	Goodenia xanthotricha	subg. Monochila	Clade C (unplaced)
		MN831856	Pentaptilon careyi (F.Muell.) E.Pritz.	790	PERTH 06909604	F. Hort, F. Obbens	2283	Goodenia careyi	subg. Monochila sect. Verreauxia	Verreauxia
MN842518	MN842654	MN831857	Pentaptilon careyi (F.Muell.) E.Pritz.	S18	CANB 00512992	D. Bellairs, B. Bellairs	5062	Goodenia careyi	subg. Monochila sect. Verreauxia	Verreauxia
MN842519	MN842655	MN831858	Scaevola collaris J.M.Black ex E.L. Robertson	603	PERTH 06473083	S. van Leeuwen	4921	Goodenia collaris	subg. Goodenia sect. Goodenia	Goodenia ss I_I
MN842520	KT724251	KT750298	Scaevola collaris J.M.Black ex E.L. Robertson	842	PERTH 09200495	K.A. Shepherd, S.R. Willis	KS 1533	Goodenia collaris	subg. Goodenia sect. Goodenia	Goodenia ss I_I
MN842521	JQ711584	JQ682693	Selliera radicans Cav.	S26	CANB 636992.1	I.D. Cresswell	02C108	Goodenia radicans	subg. Goodenia sect. Goodenia	Goodenia ss I_I
	MN842656	MN831859	Selliera rotundifolia Heenan	890	MPN 47848-1	J. Tate	sn	Goodenia heenanii	subg. Goodenia sect. Goodenia	Goodenia ss I_I
MN842522	MN842657	MN831860	Velleia arguta R.Br.	534	PERTH	R. Chinnock, S. Chinnock	RJC 10347	Goodenia arguta	subg. Monochila sect. Velleia	Velleia
	JQ711626	JQ682785	Velleia arguta R.Br.	S09	CBG 8315832	J.D. Briggs	1135	Goodenia arguta	subg. Monochila sect. Velleia	Velleia
MN842523	KT724217	KT750290	Velleia connata F. Muell.	798	PERTH 08249016	R. Davis, J. Jackson, D. Ferguson	11635	Goodenia connata	subg. Monochila sect. Velleia	Velleia
			Velleia connata F. Muell.	S10	CANB 00570481	S. van Leeuwen	4884	Goodenia connata	subg. Monochila sect. Velleia	Velleia
MN842524	MN842659		Velleia cycnoptamicaF.Muell.	344	PERTH 08293732	R. Davis	RD 11766	Goodenia cycnopotamica	subg. Monochila sect. Velleia	Velleia
MN842525	MN842658	MN831861	Velleia cycnoptamicaF.Muell.	535	PERTH 09198407	K.A. Shepherd, C. Wilkins, J.A. Wege	KS 1451	Goodenia cycnopotamica	subg. Monochila sect. Velleia	Velleia
MN842526	MN842660	MN831862	Velleia daviesii F.Muell.	634	PERTH 06794726	D.J. Edinger, G. Marsh	DJE 4008	Goodenia daviesii	subg. Monochila sect. Velleia	Velleia
MN842527			Velleia discophora F.Muell.	536	PERTH 09198334	K.A. Shepherd, C. Wilkins, J.A. Wege	KS 1467	Goodenia discophora	subg. Monochila sect. Velleia	Velleia
	MN842661	MN831863	Velleia foliosa (Benth.) K.Krause	289	KPBG 19990259	K.A. Shepherd, S.R. Willis	s.n.	Goodenia brendannarum	subg. Monochila sect. Velleia	Velleia
MN842528			Velleia foliosa (Benth.) K.Krause	835	KPBG 19990259	K.A. Shepherd, S.R. Willis	KS 1526	Goodenia brendannarum	subg. Monochila sect. Velleia	Velleia
	KT724227	KT750325	Velleia glabrata Carolin	635	PERTH 08248044	R. Davis, J. Jackson	11537	Goodenia glabrata	subg. Monochila sect. Velleia	Velleia
MN842529	MN842662	MN831864	Velleia hispida W.Fitzg.	305	PERTH 08293686	R. Davis	11772	Goodenia capillosa	subg. Monochila sect. Velleia	Velleia
MN842530		MN831865	Velleia lyrata R.Br.	681	BRI AQ539490	P.C. Jobson	4935	Goodenia caroliniana	subg. Monochila sect. Velleia	Velleia
MN842531	MN842663	MN831866	Velleia macrocalyx Vriese	636	MEL 2289281	P.K. Latz	19355	Goodenia macrocalyx	subg. Monochila sect. Velleia	Velleia
MN842532			Velleia macrophylla (Lindl.) Benth.	637	PERTH 07894260	K.R. Thiele	3484	Goodenia macrophylla	subg. Monochila sect. Velleia	Velleia
MN842533			Velleia montana Hook.f.	638	MEL 2341167	V. Stajsic	5395	Goodenia montana	subg. Monochila sect. Velleia	Velleia
MN842534		MN831867	Velleia panduriformis Benth.	639	PERTH 08141495	T. Erickson	TEE 587	Goodenia panduriformis	subg. Monochila sect. Velleia	Velleia
MN842535	MN842664	MN831868	Velleia paradoxa R.Br.	640	MEL 2314242	N.G. Walsh	6735	Goodenia paradoxa	subg. Monochila sect. Velleia	Velleia
MN842536		MN831869	Velleia pubescens R.Br.	641	MEL 2291738	P.I. Forster, K.R. McDonald	30730	Goodenia subsolana	subg. Monochila sect. Velleia	Velleia
MN842537	MN842665	MN831870	Velleia rosea S.Moore	347	PERTH 08293724	F. Hort, J. Hort	RD 11768	Goodenia rosea	subg. Monochila sect. Velleia	Velleia
MN842538	MN842666	MN831871	Velleia rosea S.Moore	642	PERTH 08150192	K.R. Thiele	3663	Goodenia rosea	subg. Monochila sect. Velleia	Velleia
	JQ711658	JQ682816	Velleia spathulata R.Br.	281	US 3068440	Robinson, Batianoff	86-0098a	Goodenia mystrophylla	subg. Monochila sect. Velleia	Velleia
MN842539	MN842667	MN831872	Velleia trinervis Labill.	539	PERTH 09198253	K.A. Shepherd, C. Wilkins, J.A. Wege	KS 1487	Goodenia trinervis	subg. Monochila sect. Velleia	Velleia
	JQ711646	JQ682831	Velleia trinervis Labill.	817	AD 97902054	E.N.S. Jackson	3307	Goodenia trinervis	subg. Monochila sect. Velleia	Velleia
MN842540	MN842668	MN831873	Verreauxia dyeri E.Pritzl ex Hemsl.	654	PERTH 08132240	K.A. Shepherd, S. Krauss	KS 982	Goodenia etheira	subg. Monochila sect. Verreauxia	Verreauxia
MN842541			Verreauxia dyeri E.Pritzl ex Hemsl.	S25	CBG 7902352	B. Barnsley	1014	Goodenia etheira	subg. Monochila sect. Verreauxia	Verreauxia
	JQ711591	JQ682791	Verreauxia reinwardtii (de Vriese) Beth.	S24	CBG 9709960	S. Donaldson, G. Flowers	1630	Goodenia reinwardtii	subg. Monochila sect. Verreauxia	Verreauxia
MN842542	MN842669	MN831874	Verreauxia verreauxii (de Vriese) Carolin	655	PERTH 08125848	F. Hort, J. Hort	FH 3576	Goodenia verreauxii	subg. Monochila sect. Verreauxia	Verreauxia
MN842480		MN831825	Goodenia sp. Bachsten Creek (M.D. Barrett 685)	526	PERTH	M.D. Barrett	MDB 2908		subg. Porphyranthus sect. Ebracteolatae	Ebracteolatae II
MN842481	MN842635	MN831826	Goodenia sp. Beyondie (L.W. Sage & S. van Leeuwen LWS 2518)	486	PERTH 07561857	S. van Leeuwen	3004		subg. Porphyranthus sect. Ebracteolatae	Ebracteolatae I
MN842482	MN842636	MN831827	Goodenia sp. Carnarvon Range (D.J. Edinger Nats 30)	789	PERTH 05241871	B. Backhouse et al.	BEMJ 127		subg. Goodenia sect. Rosulatae	Goodenia ss II_II
MN842483		MN831828	Goodenia sp. Dampier Peninsula (B.J. Carter 675)	541	PERTH	R.L. Barrett	RLB 5584		subg. Porphyranthus sect. Porphyranthus	Porphyranthus I
MN842484	MN842637	MN831829	Goodenia sp. East Pilbara (A.A. Mitchell PRP 727)	574	PERTH 05244846	A.A. Mitchell	PRP 1436		subg. Porphyranthus sect. Ebracteolatae	Ebracteolatae I
MN842485	MN842638	MN831830	Goodenia sp. Melville Island (N.B.Byrnes 666)	670	DNA D0220331	K. Brennan	9832		subg. Porphyranthus sect. Ebracteolatae	Ebracteolatae II
MN842486		MN831831	Goodenia sp. Mount Bomford (M.D. Barrett 423)	404	PERTH 07007698	M.D. Barrett, R.L. Barrett	1095		subg. Porphyranthus sect. Porphyranthus	Porphyranthus II
MN842487	MN842639	MN831832	Goodenia sp. Mt Castle Tower (M.D. Crisp 2753)	671	BRI AQ822637	A.R. Bean	30678		subg. Goodenia sect. Rosulatae	Goodenia ss II_II
MN842488		MN831833	Goodenia sp. Pilbara Calcrete (A.A. Mitchell PRP 1436)	909	PERTH 8071373	E. Thoma	ET 1433		subg. Porphyranthus sect. Ebracteolatae	Ebracteolatae I
MN842489	MN842640	MN831834	Goodenia sp. Sandy Creek (R.D. Royce 1653)	405	PERTH 06962882	L.W. Sage et al.	LWS 2506		subg. Monochila sect. Scaevolina	Scaevolina
MN842490	MN842641	MN831835	Goodenia sp. South Coast (A.R. Annels ARA1846)	406	PERTH 06749852	R.J. Cranfield	17578		subg. Monochila sect. Coeruleae	Coerulea
MN842491		MN831836	Goodenia sp. Stirling Range (R. Cranfield & D. Kabay 9148)	876	PERTH 03059766	R.J. Cranfield, D. Kabay	9148		subg. Monochila sect. Coeruleae	Coerulea
